# Supplementary material
Source: PubMed Central journal article supplement (PMC4889216)

**Figure S4. *lin-65* functions cell autonomously in the intestine to regulate DVE-1 nuclear distribution upon mitochondrial stress, Related to Figure 4**

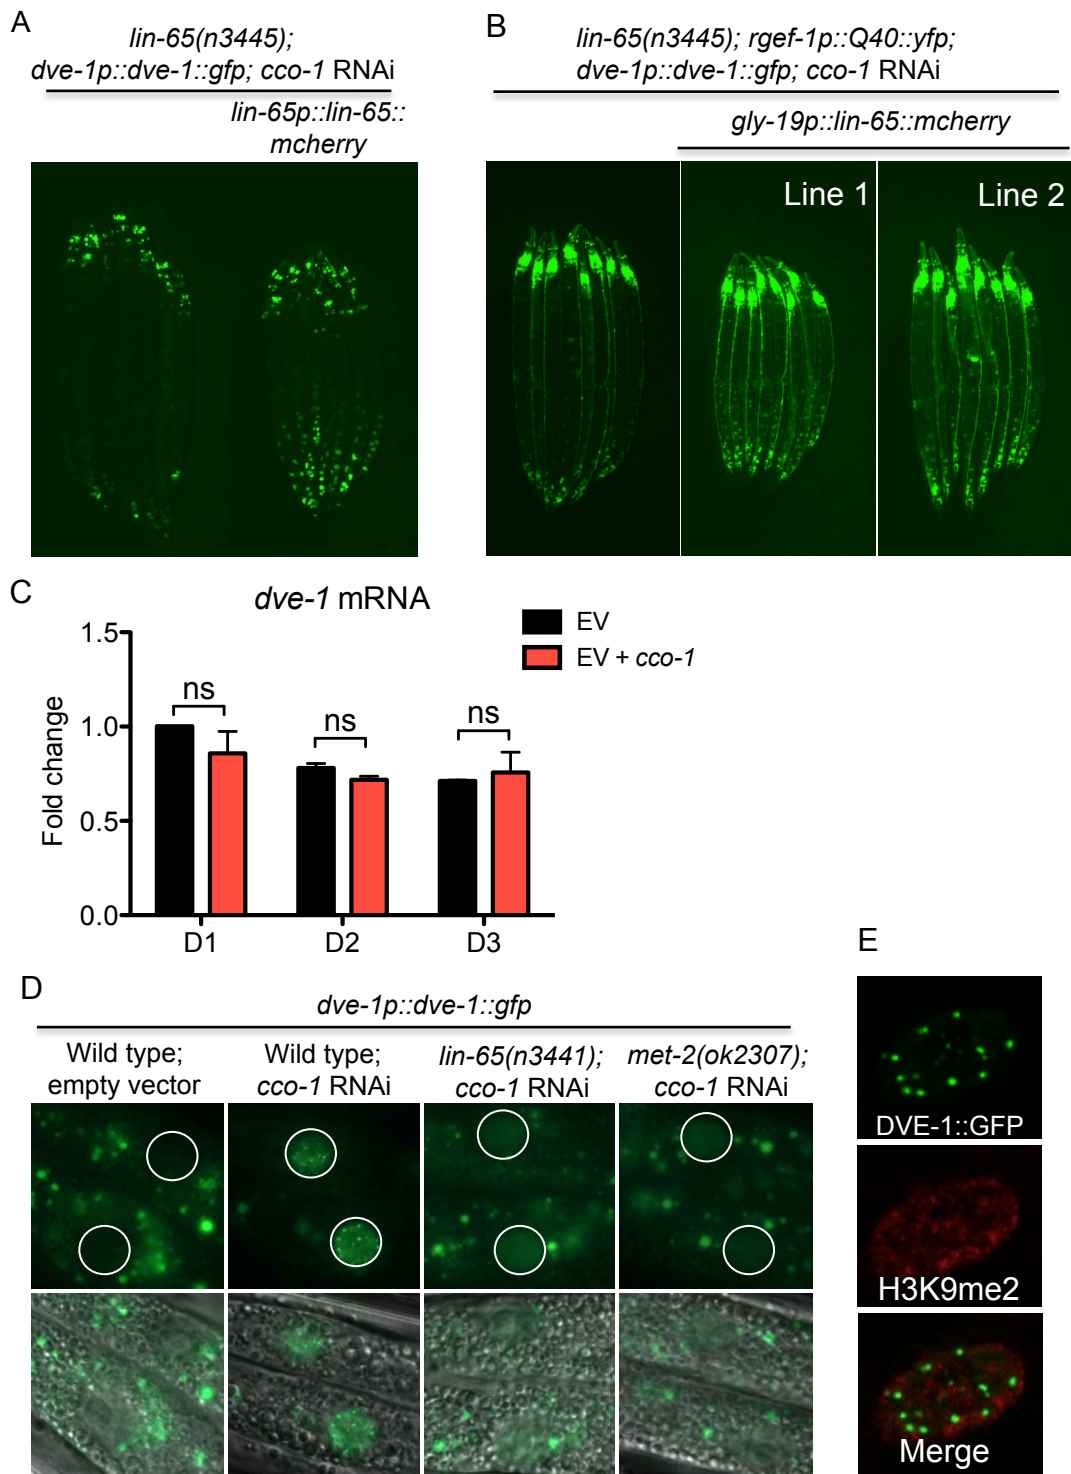

Supplement: NIHMS782816-supplement-4.pdf [file NIHMS782816-supplement-4.pdf]
