# Supplementary material
Source: PubMed Central journal article supplement (PMC4889216)

**Figure S5. Loss of *set-25* results in DVE-1::GFP nuclear accumulation but is not required for *cco-1* RNAi induced longevity, Related to Figure 4**

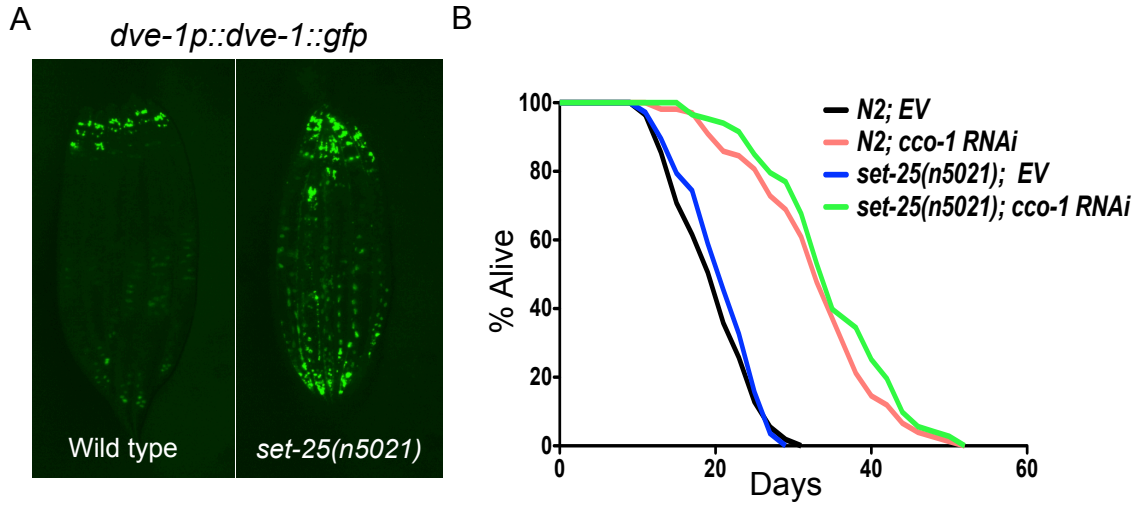

Supplement: NIHMS782816-supplement-5.pdf [file NIHMS782816-supplement-5.pdf]
