# Supplementary material
Source: PubMed Central journal article supplement (PMC4889216)

**Figure S6. Heatmaps for gene differentially expressed under *cco-1* RNAi in wild type animals, Related to Figure 5**

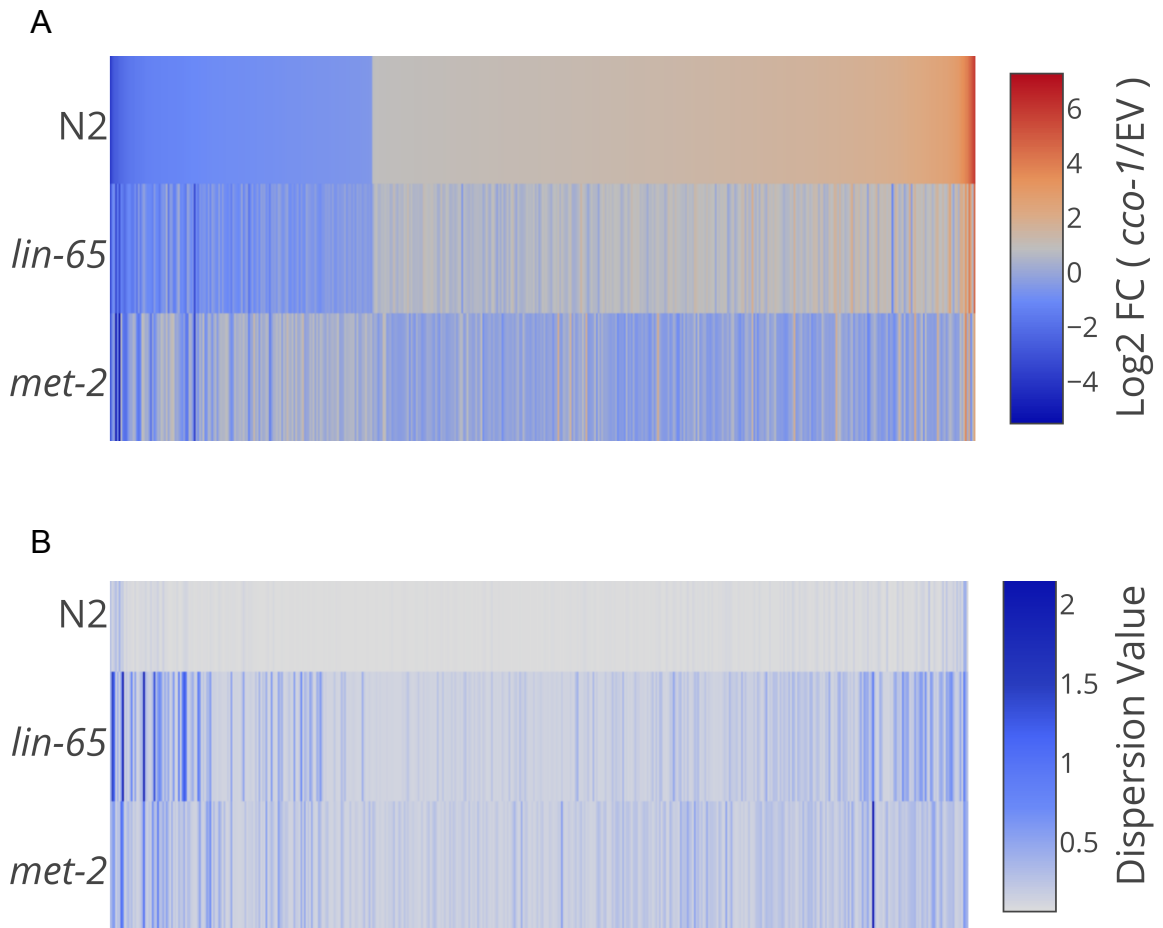

Supplement: NIHMS782816-supplement-6.pdf [file NIHMS782816-supplement-6.pdf]
