# Supplementary material
Source: PubMed Central journal article supplement (PMC4889216)

**Figure S7. *dve-1* RNAi affects LIN-65 protein stability and *atfs-1* RNAi induces LIN-65 accumulation in the absence of mitochondrial stress, Related to Figure 6**

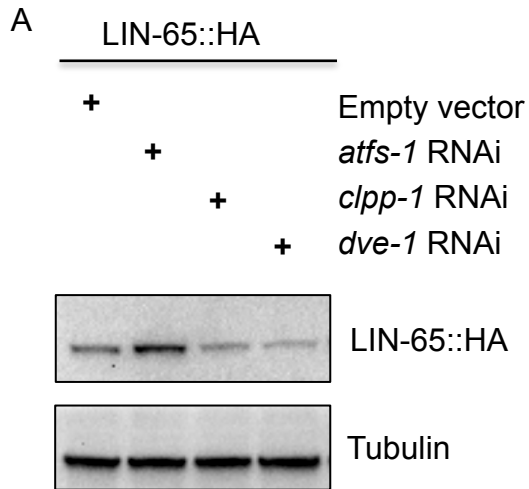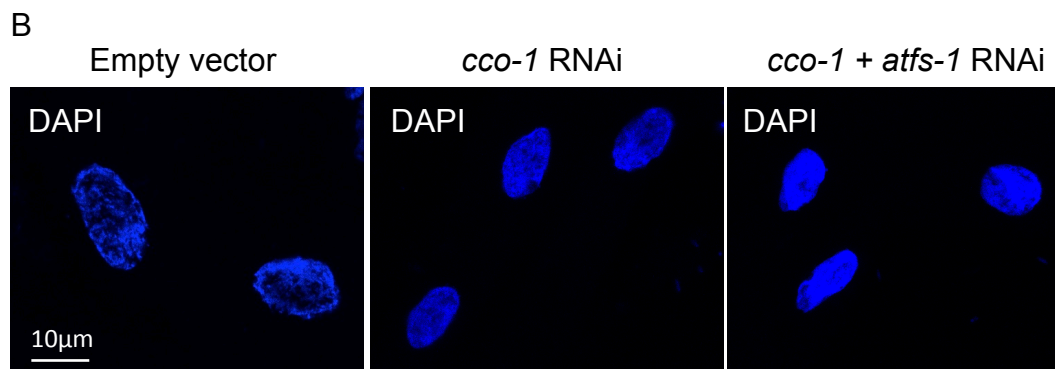

Supplement: NIHMS782816-supplement-7.pdf [file NIHMS782816-supplement-7.pdf]
