# Supplementary material
Source: PubMed Central journal article supplement (PMC4889216)

**Figure S1. *lin-65* is specifically required for UPR<sup>mt</sup> induction, Related to Figure 1**

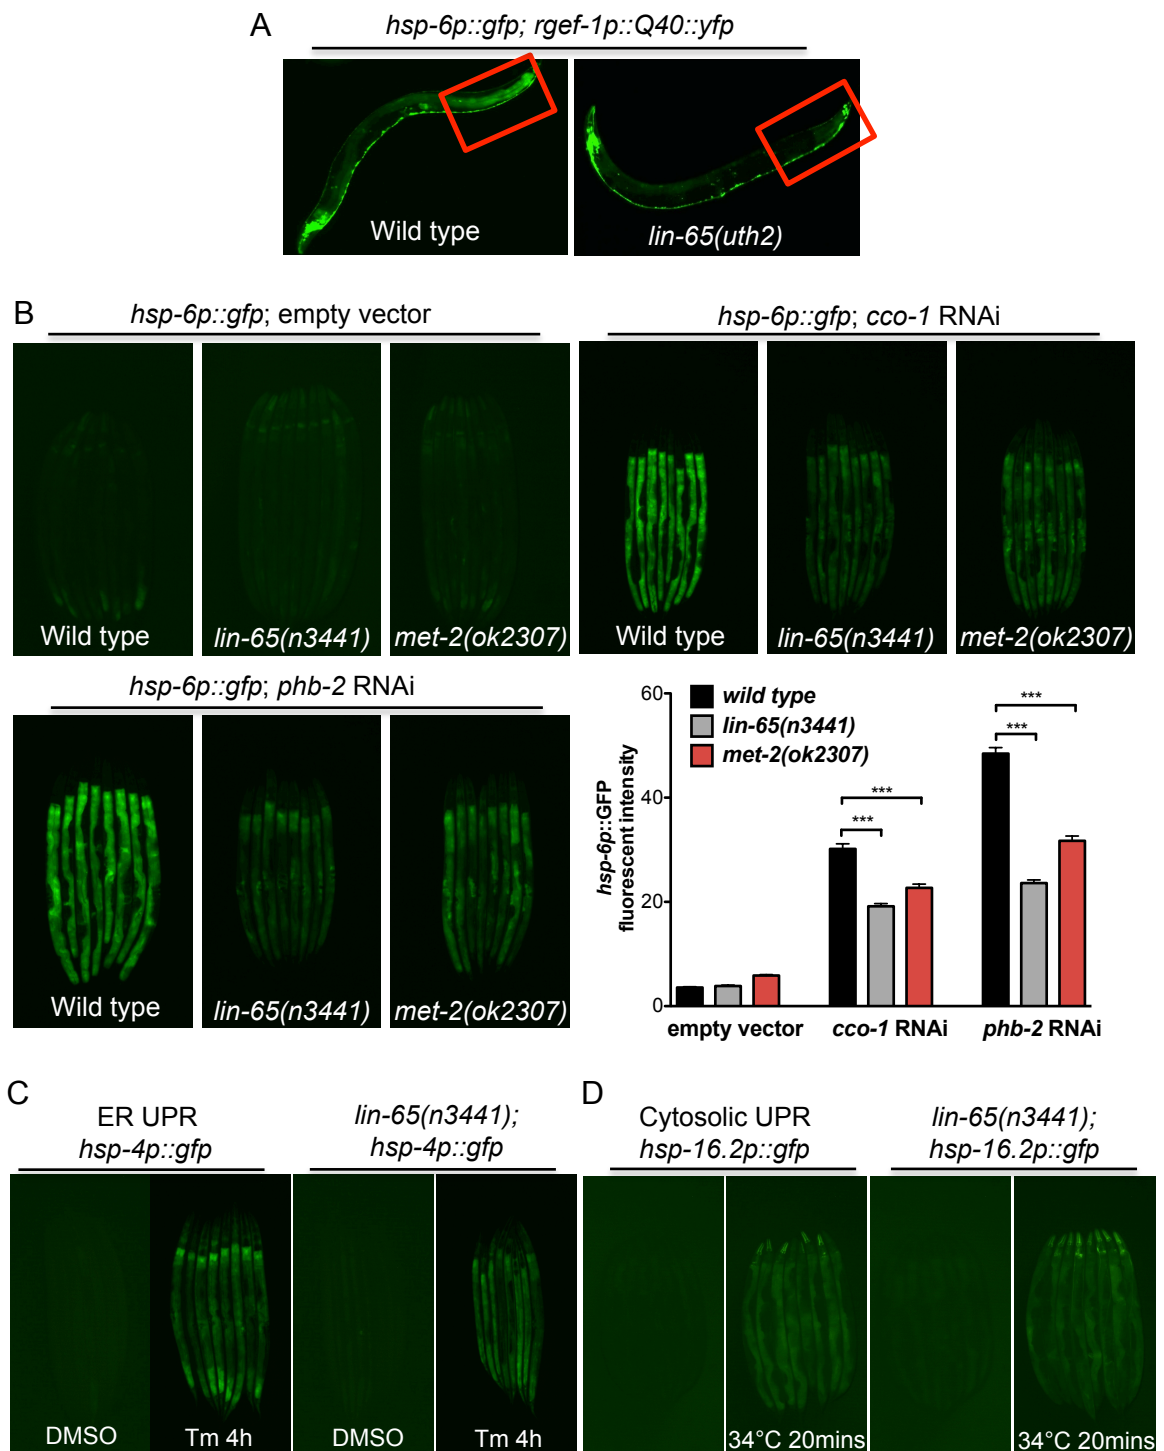

Supplement: NIHMS782816-supplement-1.pdf [file NIHMS782816-supplement-1.pdf]

**Figure S2. *lin-65* is mainly expressed in the intestine and neurons, Related to Figure 2**

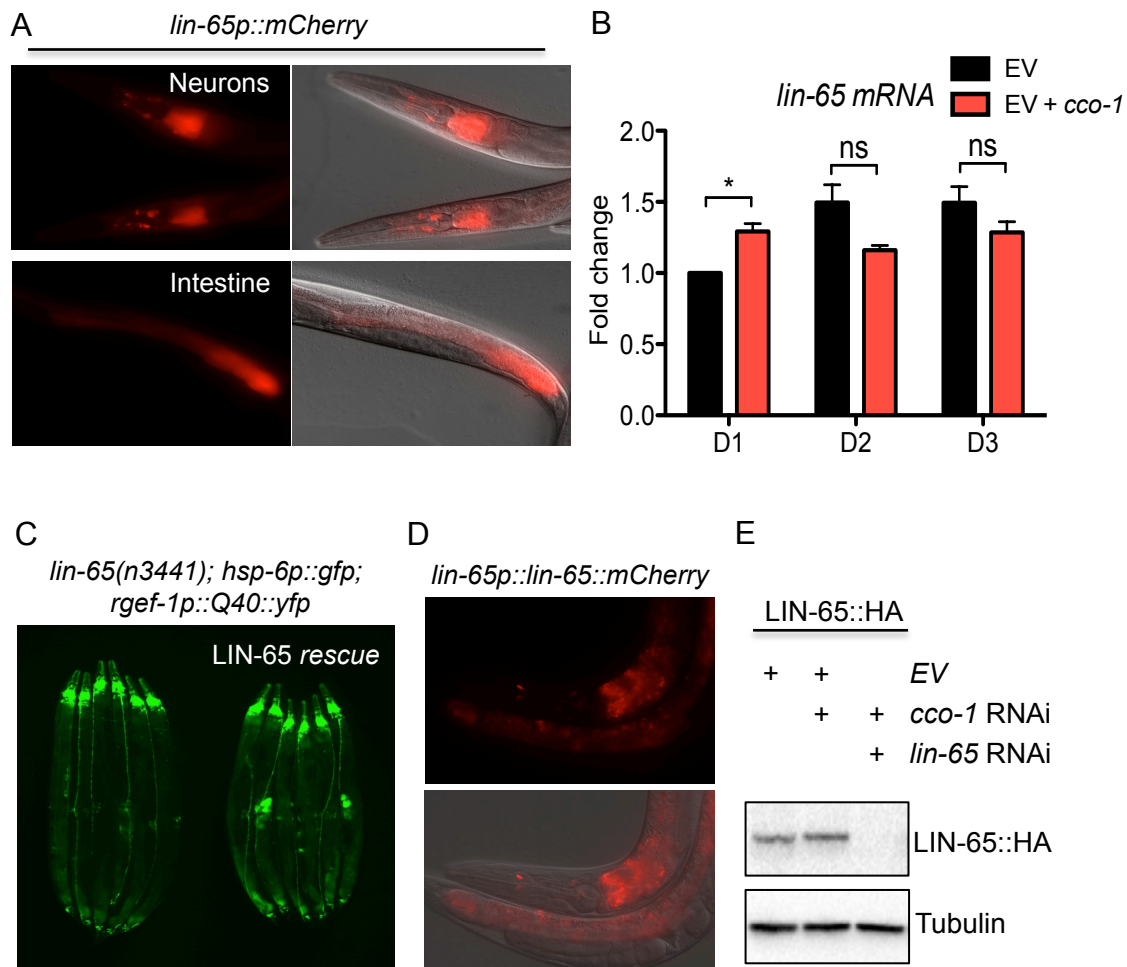

Supplement: NIHMS782816-supplement-2.pdf [file NIHMS782816-supplement-2.pdf]

**Figure S3. *cco-1* RNAi does not change the number or their DNA content, Related to Figure 3**

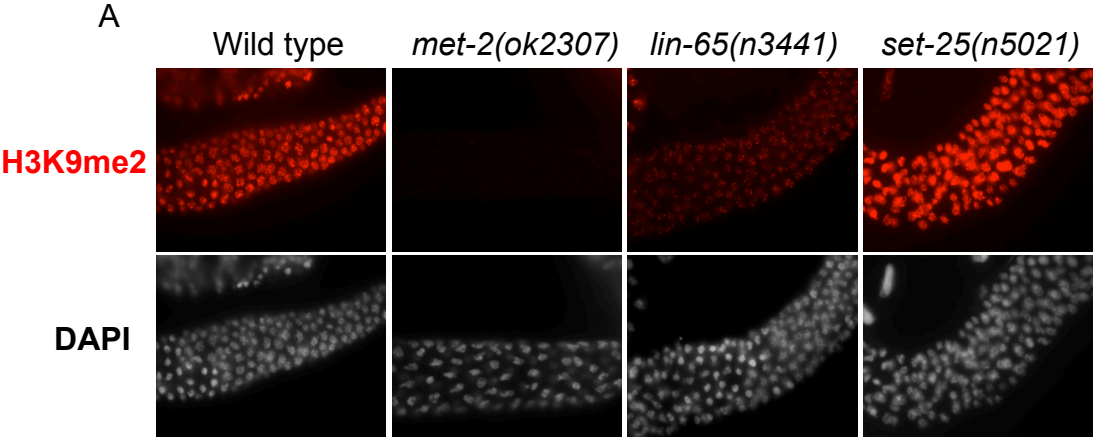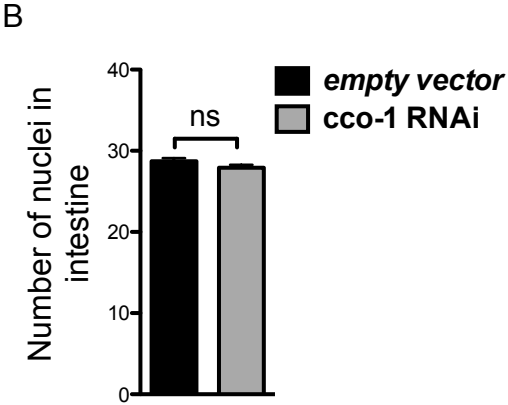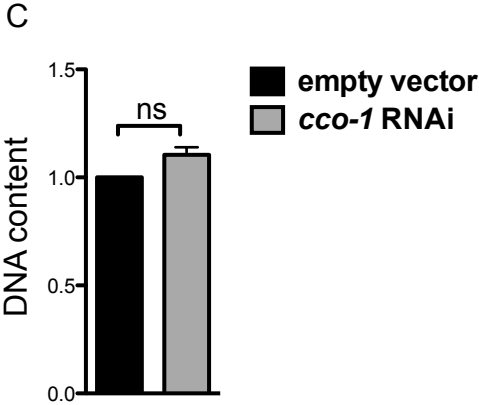

Supplement: NIHMS782816-supplement-3.pdf [file NIHMS782816-supplement-3.pdf]
